# Supplementary material
Source: publisher figshare collection journal article supplement (https://sage.figshare.com/ndownloader/files/13569614)
Supplement: Supplementary file 1 [file 13569614]

**Supplementary Table 1:** Association between Neuro-QOL and MSFC-4 domains using Spearman's correlation coefficient

|                          | MSFC-4 Walk | MSFC-4 9HPT |
|--------------------------|-------------|-------------|
| Ability                  | 0.409       | 0.364       |
| Anxiety                  | -0.133      | -0.073      |
| Cognitive                | 0.198       | 0.154       |
| Depression               | -0.186      | -0.19       |
| Emotional/ behavioral    | -0.019      | -0.057      |
| Fatigue                  | -0.246      | -0.142      |
| Lower extremity function | 0.684       | 0.587       |
| Positive affect          | 0.158       | 0.178       |
| Satisfaction             | 0.347       | 0.304       |
| Stigma                   | -0.416      | -0.371      |
| Upper extremity function | 0.534       | 0.542       |

Legend: MSFC: Multiple Sclerosis Functional Composite; 9HPT: 9-hole peg test. Z-scores for the walk and 9-HPT were used for these correlations, and a higher z-score indicates better functioning. Neuro-QOL Ability: Ability to Participate in Social Roles and Activities; Neuro-QOL Cognitive: Cognitive Function; Neuro-QOL Emotional/behavioral: Emotional and Behavioral Dyscontrol; Neuro-QOL Positive affect: Positive Affect and Well-Being; Neuro-QOL Satisfaction: Satisfaction with Social Roles and Activities.

Cells have been color coded based on the strength of the correlation (estimated Pearson's correlation coefficient) between the measures. Since some of the correlations are negative, the color coding is based on the absolute value of the correlation. Yellow:  $0.6 \leq r \leq 0.7$ ; Green:  $0.5 \leq r \leq 0.6$ ; Blue:  $0.4 \leq r \leq 0.5$
